# Supplementary material for: Atmospheric Pressure Plasma Treatment of Magnesium Alloy for Enhanced Coating Adhesion and Corrosion Resistance
Source: MDPI journal article supplement (doi:10.3390/coatings13050897), 2023-05-10
Supplement: s1 [file s1]

## Supporting Information

# Atmospheric Pressure Plasma Treatment of Magnesium Alloy for Enhanced Coating Adhesion and Corrosion Resistance

Gyoung Gug Jang <sup>1,\*</sup>, Jiheon Jun <sup>2</sup>, Sinchul Yeom <sup>2</sup>, Mina Yoon <sup>2</sup>, Yi Feng Su <sup>2</sup>, John Wade <sup>2</sup>, Michael S. Stephens <sup>2</sup> and Jong K. Keum <sup>3</sup>

<sup>1</sup> Manufacturing Science Division, Oak Ridge National Laboratory (ORNL),  
Oak Ridge, TN 37831, USA

<sup>2</sup> Materials Science and Technology Division, Oak Ridge National Laboratory (ORNL),  
Oak Ridge, TN 37831, USA

<sup>3</sup> Center for Nanophase Materials Science and Neutron Scattering Division, Oak Ridge  
National Laboratory (ORNL), Oak Ridge, TN 37831, USA

\* Correspondence: jangg@ornl.gov

This manuscript has been authored by UT-Battelle, LLC, under contract DE-AC05-00OR22725 with the US Department of Energy (DOE). The US government retains and the publisher, by accepting the article for publication, acknowledges that the US government retains a nonexclusive, paid-up, irrevocable, worldwide license to publish or reproduce the published form of this manuscript, or allow others to do so, for US government purposes. DOE will provide public access to these results of federally sponsored research in accordance with the DOE Public Access Plan (<http://energy.gov/downloads/doe-public-access-plan>).

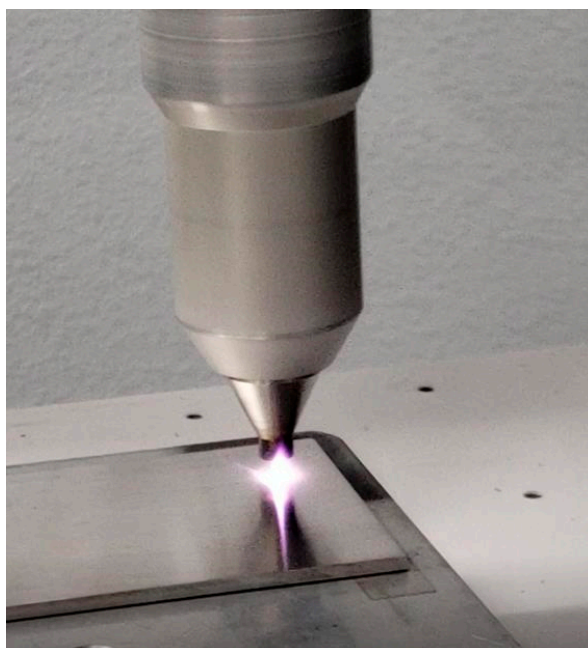

**Figure S1.** Atmospheric-pressure N<sub>2</sub> plasma treatment on AZ91D (7.6 cm × 10.2 cm, 0.3 cm thick).

**Table S1.** Water contact angle measurement on CO<sub>2</sub> and Air AP-treated AZ91D surfaces.

| AS-IS                                                                               | Fresh 600 grit                                                                      | CO <sub>2</sub> -AP                                                                  | Air-AP                                                                                |
|-------------------------------------------------------------------------------------|-------------------------------------------------------------------------------------|--------------------------------------------------------------------------------------|---------------------------------------------------------------------------------------|
| 82.3 ± 6.3° (n=8)                                                                   | 32.5 ± 7.3° (n=8)                                                                   | Not measurable (<10°)                                                                | 19.5 ± 8.3° (n=8)                                                                     |
| 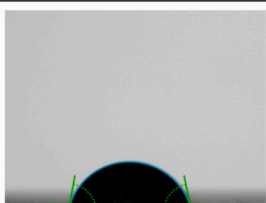 |  |  |  |

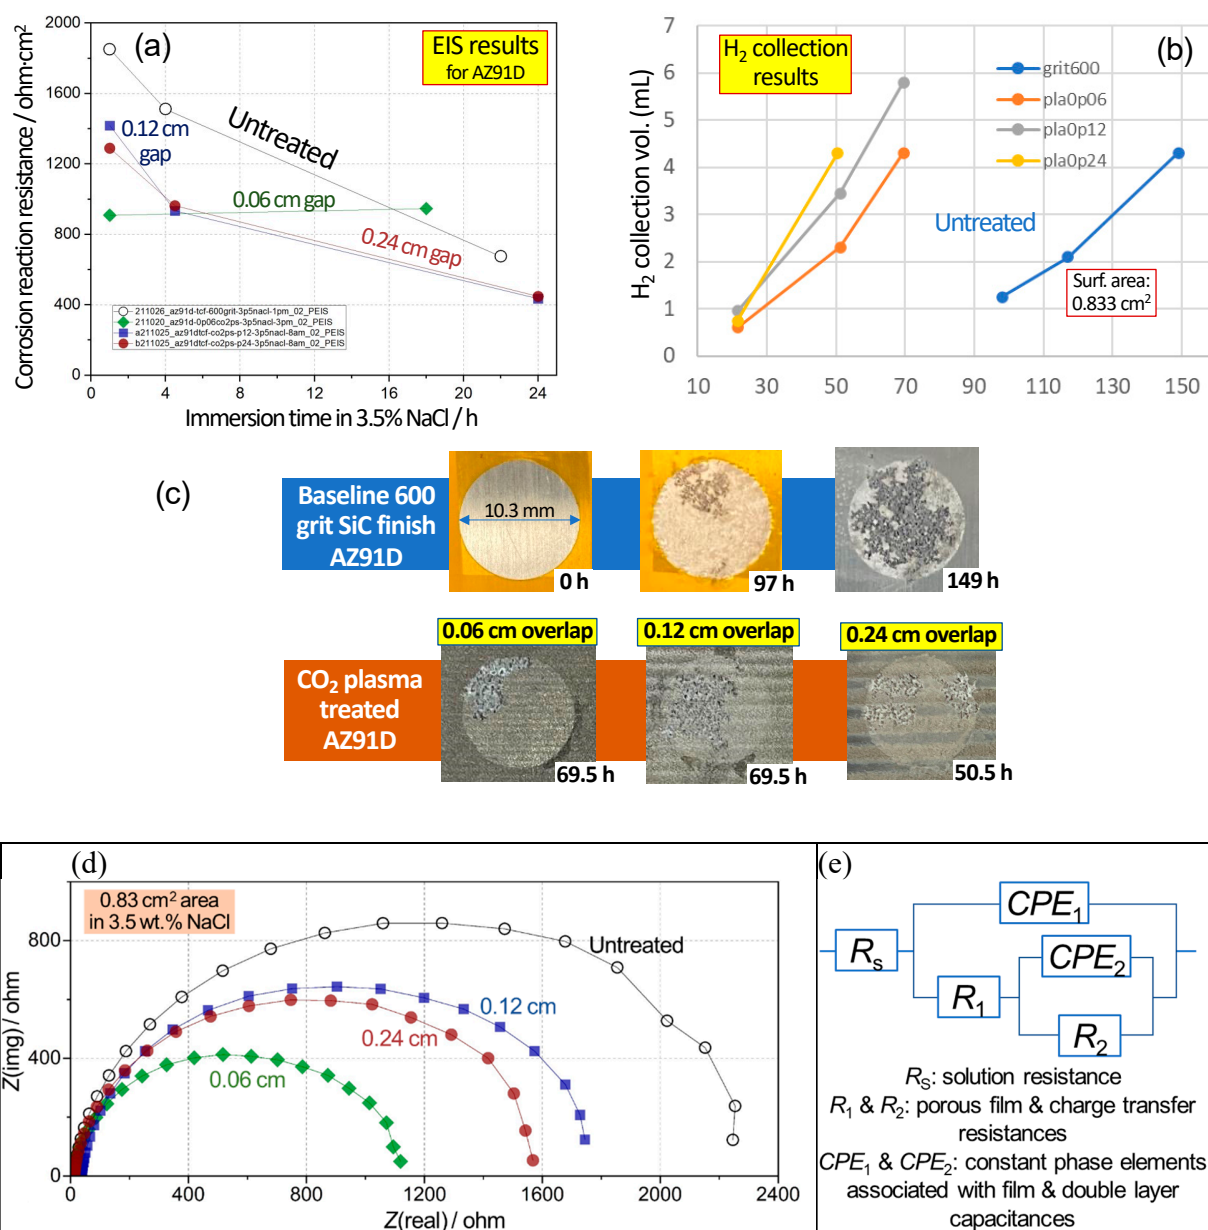

**Figure S2.** (a) Corrosion reaction resistance of CO<sub>2</sub> AP-treated AZ91D and untreated surfaces over time in 3.5% NaCl. (b) Hydrogen collection of CO<sub>2</sub>\_AP-treated vs. untreated AZ91D surfaces (c) corresponding photo images of samples after hydrogen collection. (d) Nyquist impedance spectra of untreated and CO<sub>2</sub> AP-treated AZ91D with 3 different spacings after 1 h immersion. The lowest frequency is 1.3 Hz for the impedance spectra. Note that the impedance spectra at frequencies < 1.3 Hz were noisy, so they were not used for the impedance data fitting. (e) equivalent circuit used to fit the impedance data. The corrosion reaction resistance was determined from the sum of  $R_1$  and  $R_2$ . The chi-square values of all fitting were lower than 0.002, indicating sufficient quality of data fitting.

**Table S2.** process parameters of N<sub>2</sub> AP treatment.

| Process | Distance (mm) | Speed (mm/s) | Gas Flow Rate (L/min) | Power (W) |
|---------|---------------|--------------|-----------------------|-----------|
| 1       | 4             | 25           | 33                    | 523       |
| 2       | 4             | 10           | 33                    | 516       |
| 3       | 4             | 5            | 33                    | 511       |
| 4       | 4             | 1            | 33                    | 510       |
| 5       | 4             | 3            | 33                    | 515       |
| 6       | 4             | 3            | 33                    | 547       |
| 7       | 4             | 10           | 33                    | 608       |
| 8       | 4             | 10           | 45                    | 640       |
| 9       | 8             | 10           | 45                    | 643       |

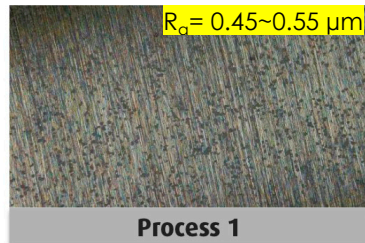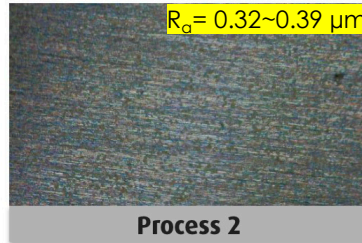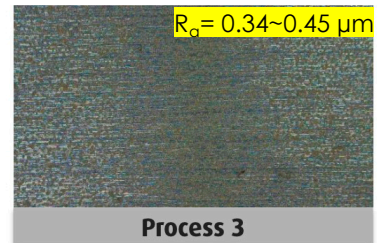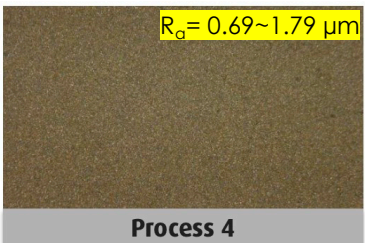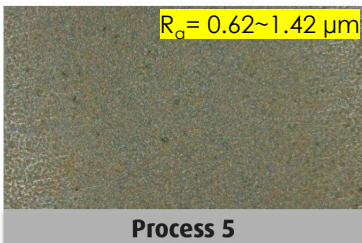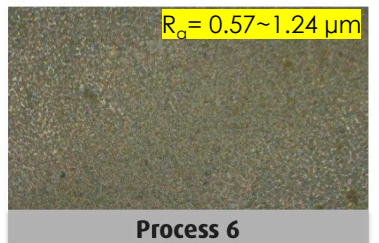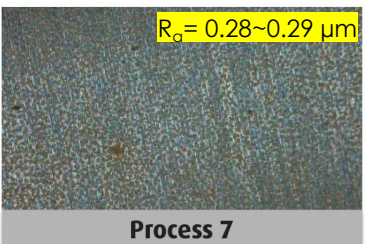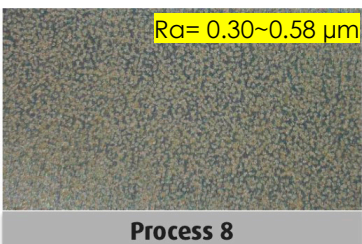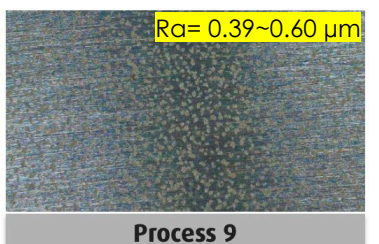

**Figure S3.** Optical microscopic images of AZ91D treated with one time swing of N<sub>2</sub> AP treatment with various operation parameters, corresponding to the Table S2.



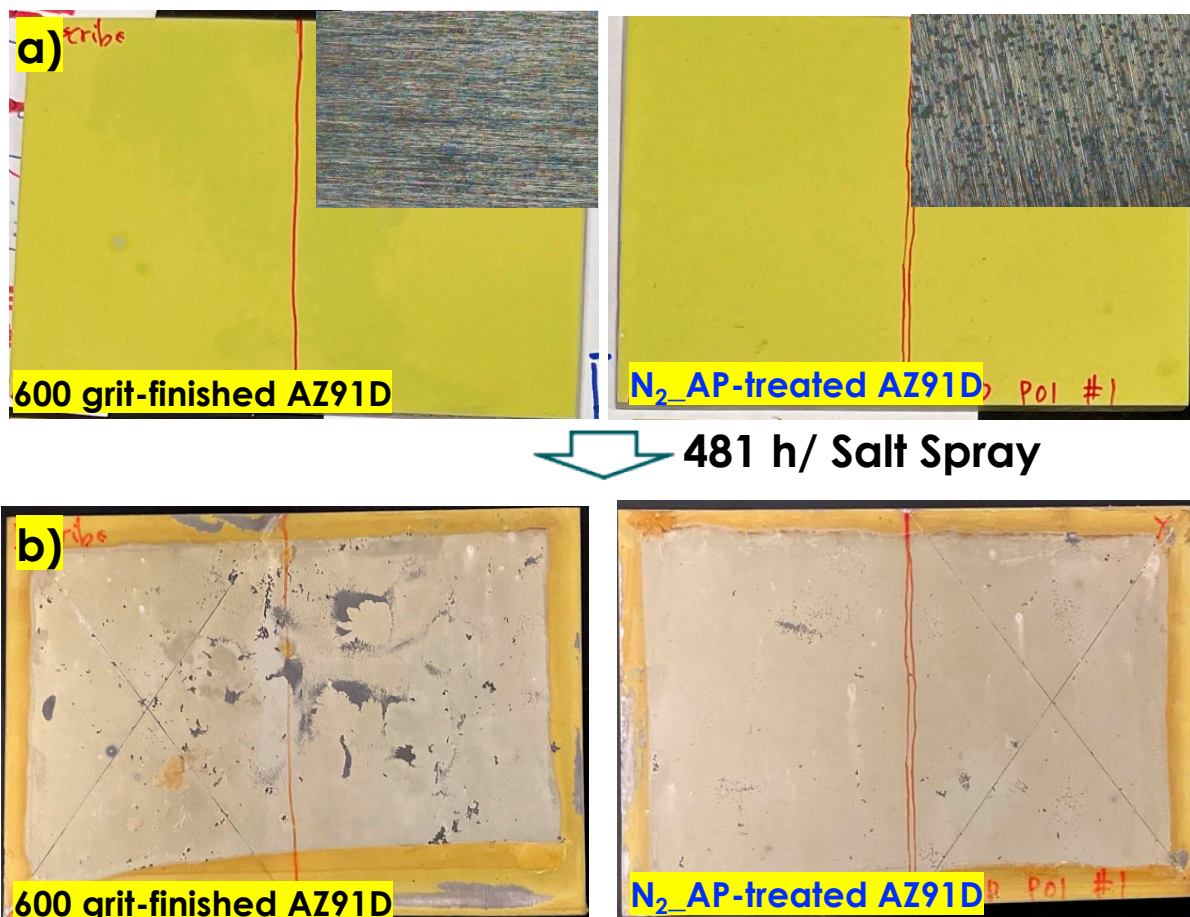

**Figure S4.** Scalable MIL 23377 primer-coated AZ91D sheet samples (7.6 cm × 10.2 cm × 0.2 cm) after 481 hours in a salt spray chamber. Inset photos are 600 grit finished AZ91D and N<sub>2</sub> AP-treated AZ91D with the operation parameter of process 1.
