# Supplementary material for: Atmospheric Pressure Plasma Treatment of Magnesium Alloy for Enhanced Coating Adhesion and Corrosion Resistance
Source: MDPI journal article supplement (doi:10.3390/coatings13050897), 2023-05-10
Supplement: s1 [file s1]

Archive with 1 entries (1 files):
- coatings-2310952-supplementary.pdf
